# Supplementary material
Source: PubMed Central journal article supplement (PMC6205894)

## **Legends for Supplemental Movies**

*Movie 1. Pre- and post-operative echocardiography in a patient who underwent surgical aortic valve replacement (SAVR) for aortic stenosis. Pre-operatively, this patient had associated basal septal hypertrophy (BSH) as shown in increased wall thickness in basal interventricular septum (IVS), reduced IVS to aorta angle and reduced strain in the basal IVS as shown in blue signals. After SAVR, echocardiography showed clear improvements in both basal IVS thickness, IVS to aorta angle and the basal IVS strain as shown in pink signals. LA indicates left atrium; and LV, left ventricle.*

*Movie 2. Pre- and post-operative echocardiography in a patient who underwent transcatheter aortic valve replacement (TAVR) for aortic stenosis. Pre-operatively, this patient had associated basal septal hypertrophy (BSH) as shown in increased wall thickness in basal interventricular septum (IVS), reduced IVS to aorta angle and reduced strain in the basal IVS as shown in blue signals. After TAVR, echocardiography did not show clear improvements in both basal IVS thickness, IVS to aorta angle and the basal IVS strain. LA indicates left atrium; and LV, left ventricle.*

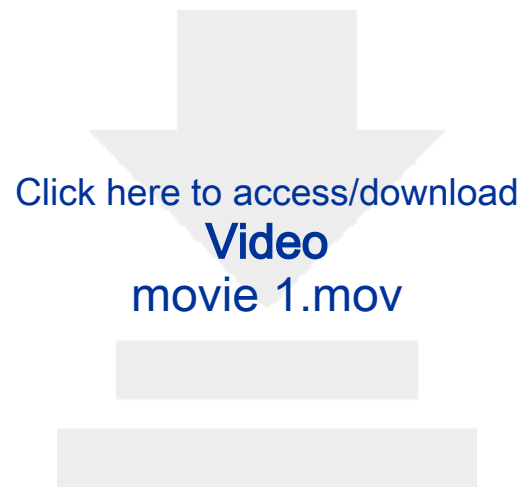

[Click here to access/download](#)

**Video**

movie 1.mov

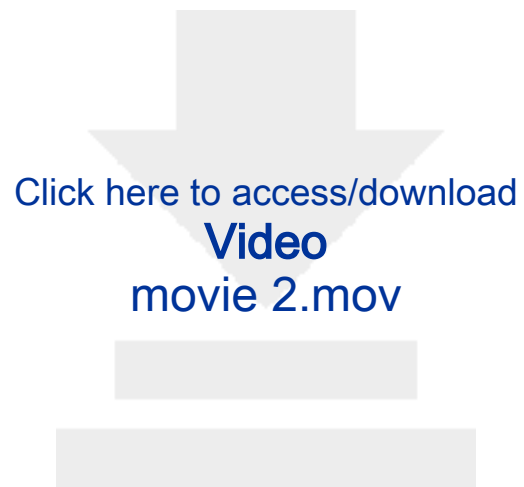

[Click here to access/download](#)

**Video**

movie 2.mov

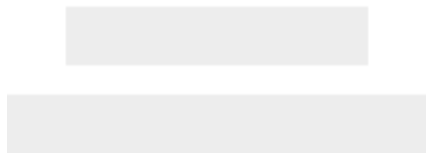

Supplement: NIHMS988359-supplement-1.pdf [file NIHMS988359-supplement-1.pdf]
